# Supplementary material for: Antagonistic peptide technology for functional dissection of CLE peptides revisited
Source: PubMed Central journal article supplement (PMC4526918; doi:10.1093/jxb/erv284), 2015-06-30
Supplement: supp_erv284_jexbot146936_file001.pdf [file supp_erv284_jexbot146936_file001.pdf]

## SUPPLEMENTAL TABLES

|                                      | starch<br>in D1 | no starch in<br>D1 | no starch in<br>D1+D2 | starch in<br>QC | starch in<br>P1 | n  |
|--------------------------------------|-----------------|--------------------|-----------------------|-----------------|-----------------|----|
| <b>Col-0</b>                         | 2.20            | 65.20              | 32.60                 | 0.00            | 0.00            | 89 |
| <i>cle40-2</i>                       | 1.20            | 40.70              | 58.10                 | 0.00            | 0.00            | 86 |
| <b>Col-0 + CLE40p</b>                | 53.97           | 36.51              | 3.17                  | 6.35            | 0.00            | 63 |
| <b>Col-0 + CLE40p<sup>6Thr</sup></b> | 31.82           | 53.03              | 10.61                 | 4.55            | 0.00            | 66 |
| <b>Col-0 + CLV3p</b>                 | 66.67           | 19.44              | 9.72                  | 4.17            | 0.00            | 72 |
| <b>Col-0 + CLV3p<sup>6Thr</sup></b>  | 62.90           | 20.97              | 6.45                  | 9.68            | 0.00            | 62 |

**Table S1. Quantification of distal root phenotypes after antagonistic peptide treatments.**

Frequency in percent of *A. thaliana* roots carrying starch granules in the designated domains with or without peptide treatment. Seedlings were assayed by mPSPI staining 5 days after germination on medium  $\pm$  1  $\mu$ M of peptide. P1 = proximal layer position one; QC = quiescent center position; D1 = distal layer position one; D2 = distal layer position two; n = number of main root tips analysed.

| Name           | Sequence     | 6A | 6T  |
|----------------|--------------|----|-----|
| <b>CLV3p</b>   | RTVPSGPDPLHH | nd | ++  |
| <b>IDAp</b>    | PIPPSAPGRKHN | ++ | ++  |
| <b>CLE40p</b>  | RQVPTGSDPLHH | nd | ++  |
| <b>CLE27p</b>  | RIVPSCPDPLHN | ++ | ++  |
| <b>CLE26p</b>  | RKVPRGPDPIHN | ++ | +   |
| <b>CLE1/4p</b> | RLSPGGPDPRHH | -  | -   |
| <b>CLE7p</b>   | RFSPGGPDPQHH | -  | -   |
| <b>CLE45p</b>  | RRVRRGSDPIHN | nd | (+) |

**Table S2. Summary of mutations and phenotypes.** Mutations at position six in CLE or IDA peptides has little effect in the context P[S/T]mP (where m is a mutation to A or T), but produce a peptide with reduced activity in the context [P/R]RmP. nd, not determined.
